# Supplementary material for: CRL4WDR1 Controls Polo-like Kinase Protein Abundance to Promote Bilobe Duplication, Basal Body Segregation and Flagellum Attachment in Trypanosoma brucei
Source: PubMed Central journal article supplement (PMC5241021; doi:10.1371/journal.ppat.1006146), 2017-01-04

# S4 Figure

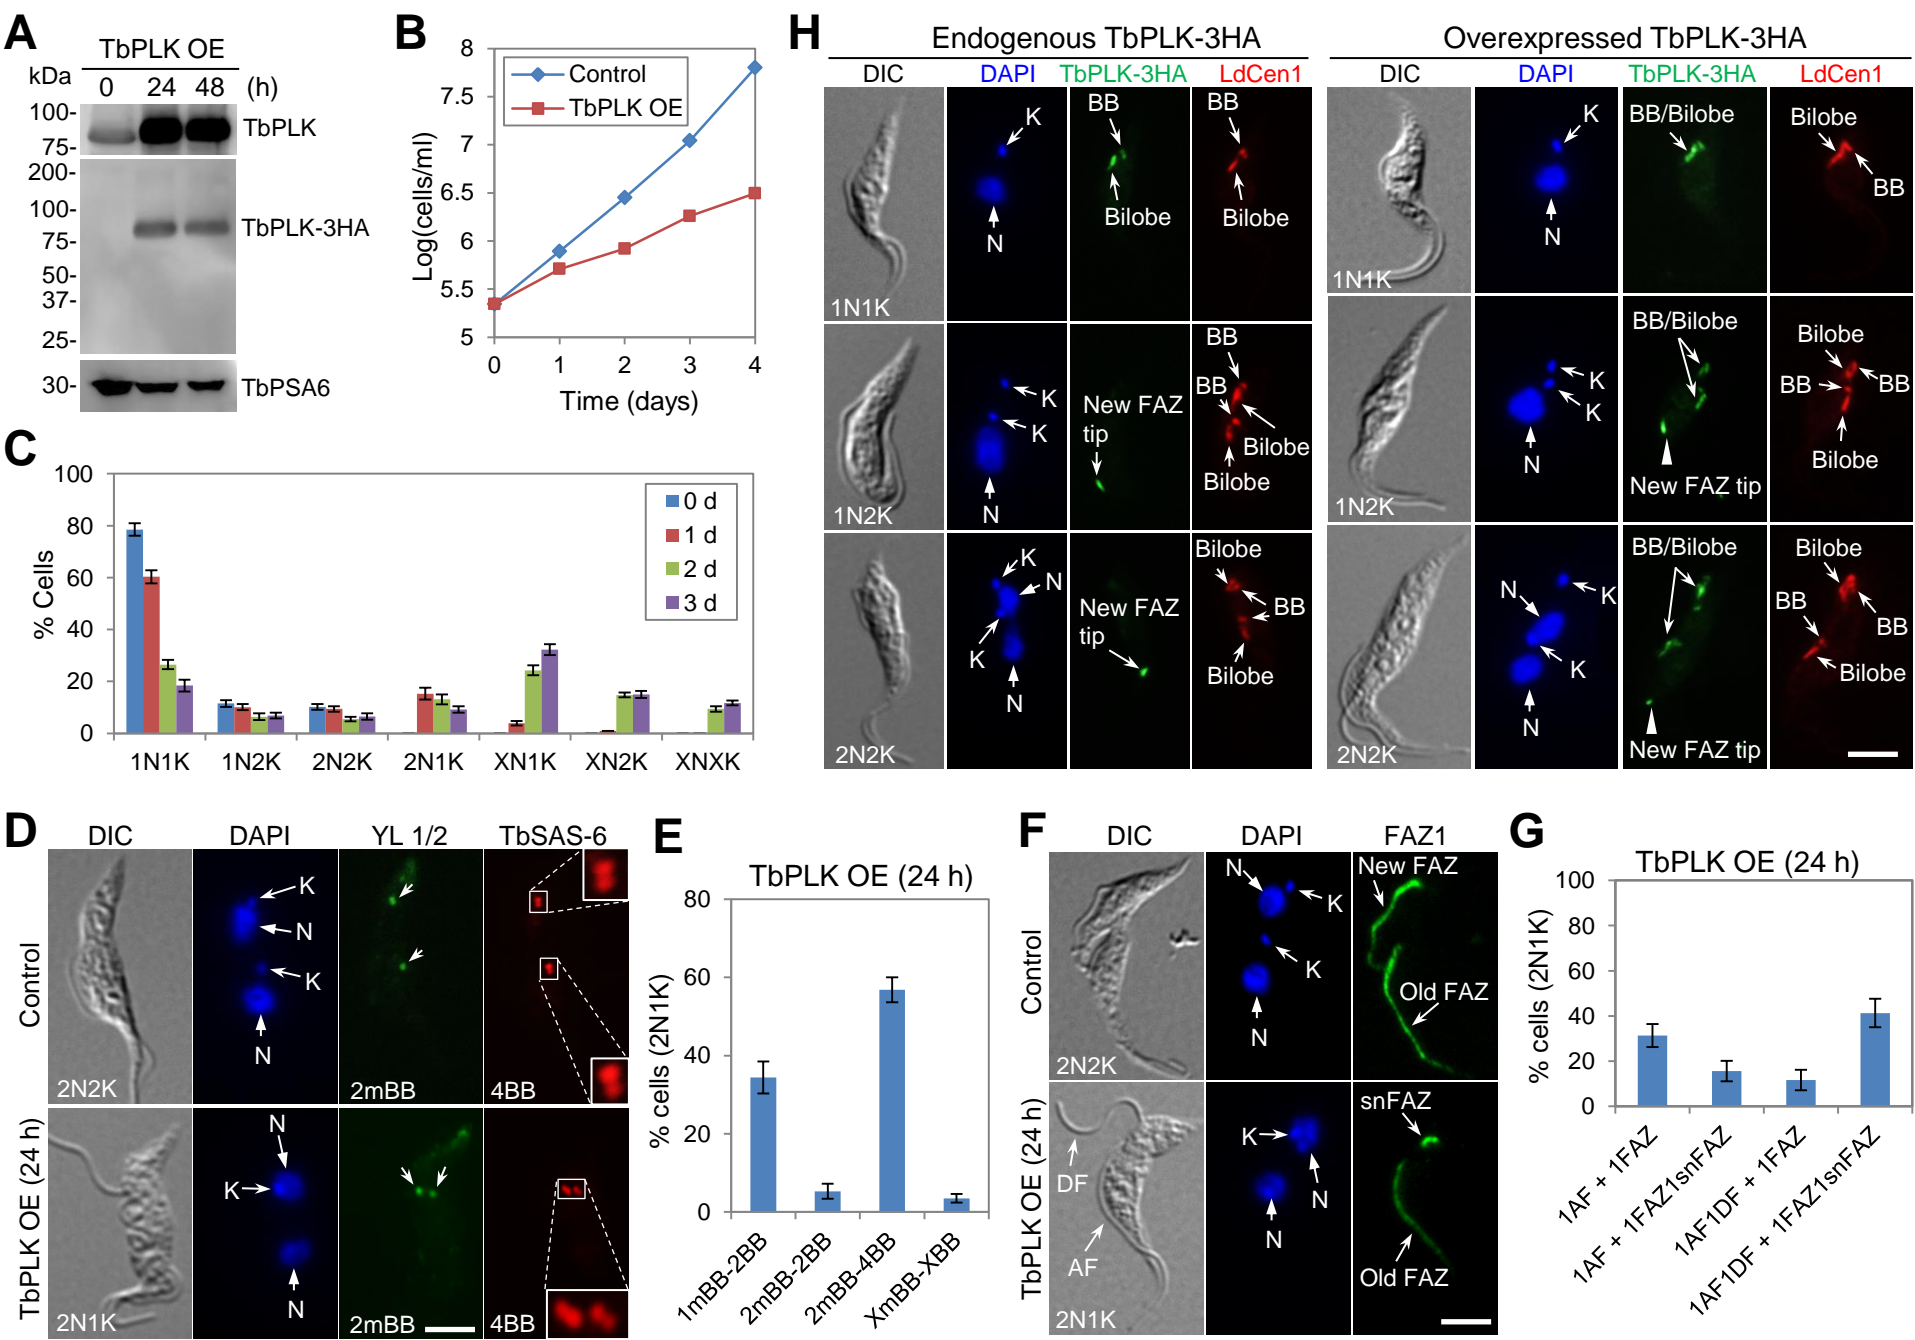

Supplement: ppat.1006146.s004.pdf [file ppat.1006146.s004.pdf]
